# Supplementary material
Source: PubMed Central journal article supplement (PMC6050717)
Supplement: mmc2.pdf [file mmc2.pdf]

# Protein Corona in Response to Flow: Effect on Protein Concentration and Structure

Dhanya T. Jayaram,<sup>1</sup> Samantha M. Pustulka,<sup>2</sup> Robert G. Mannino,<sup>3,4,5</sup> Wilbur A. Lam,<sup>3,4,5,6</sup> and Christine K. Payne<sup>1,6,\*</sup>

<sup>1</sup>School of Chemistry and Biochemistry, Georgia Institute of Technology, Atlanta, Georgia; <sup>2</sup>School of Chemical and Biomolecular Engineering, Georgia Institute of Technology, Atlanta, Georgia; <sup>3</sup>The Wallace H. Coulter Department of Biomedical Engineering, Georgia Institute of Technology and Emory University, Atlanta, Georgia; <sup>4</sup>Division of Pediatric Hematology/Oncology, Department of Pediatrics, Emory University School of Medicine, Atlanta, Georgia; <sup>5</sup>Children's Healthcare of Atlanta, Aflac Cancer & Blood Disorders Center, Atlanta, Georgia; and <sup>6</sup>Parker H. Petit Institute for Bioengineering and Biosciences, Georgia Institute of Technology, Atlanta, Georgia

**ABSTRACT** Nanoparticles used in cellular applications encounter free serum proteins that adsorb onto the surface of the nanoparticle, forming a protein corona. This protein layer controls the interaction of nanoparticles with cells. For nanomedicine applications, it is important to consider how intravenous injection and the subsequent shear flow will affect the protein corona. Our goal was to determine if shear flow changed the composition of the protein corona and if these changes affected cellular binding. Colorimetric assays of protein concentration and gel electrophoresis demonstrate that polystyrene nanoparticles subjected to flow have a greater concentration of serum proteins adsorbed on the surface, especially plasminogen. Plasminogen, in the absence of nanoparticles, undergoes changes in structure in response to flow, characterized by fluorescence and circular dichroism spectroscopy. The protein-nanoparticle complexes formed from fetal bovine serum after flow had decreased cellular binding, as measured with flow cytometry. In addition to the relevance for nanomedicine, these results also highlight the technical challenges of protein corona studies. The composition of the protein corona was highly dependent on the initial mixing step: rocking, vortexing, or flow. Overall, these results reaffirm the importance of the protein corona in nanoparticle-cell interactions and point toward the challenges of predicting corona composition based on nanoparticle properties.

## INTRODUCTION

Nanomedicine offers the promise of treating human disease with nanoparticles (NPs) that significantly enhance the function of conventional molecular-scale drugs (1). Nanomedicines have the ability to target a specific subpopulation of cells and then release a drug or combination of drugs now localized at these specific cells. Despite intense research in this area, very few NPs have been translated to the clinic. A recent analysis of the literature suggests one reason for the lack of success in the field of cancer nanomedicines, estimating that only 0.7% of injected NPs reach tumors, whereas the vast majority of NPs instead accumulate in the liver and spleen (2). Although 0.7% may be an underestimate, it does highlight the significant challenges facing the advancement of nanomedicine. Successful NP tumor target-

ing, both passive and active, requires the NPs to stay in circulation long enough to reach and accumulate at the tumors. In comparison, most NPs are rapidly cleared from the bloodstream, accumulating in the liver and spleen after recognition by the reticuloendothelial system. By being cleared to the liver, the NPs lack the circulation time necessary to reach their target. Non-tumor-targeting applications, such as cardiovascular disease, have similar clearance challenges.

Many nanomedicines will be delivered intravenously, subjecting them to the forces associated with blood flow. The flow rates of the circulatory system range from relatively slow speeds in capillaries (0.085 cm/s) to rapid flow in the arteries (~10 cm/s) with peak velocities of ~60 cm/s in the aorta (3–5). The subsequent interaction of the immune system with NPs is mediated by a layer of blood serum proteins that adsorb on the NP surface during circulation. This opsonization, resulting in a “corona” of proteins on the NP surface (6–15), can be decreased by PEGylation, but complete inhibition remains a challenge (16–22). The protein corona, described as either a “hard” corona of tightly bound

Submitted November 10, 2017, and accepted for publication February 5, 2018.

\*Correspondence: [christine.payne@duke.edu](mailto:christine.payne@duke.edu)

Christine K. Payne's present address is Department of Mechanical Engineering and Materials Science, Duke University, Durham, North Carolina.

Editor: Antoine van Oijen.

<https://doi.org/10.1016/j.bpj.2018.02.036>

© 2018 Biophysical Society.

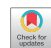

proteins or a “soft” corona of dynamic, weakly bound proteins (23–26), has been studied extensively as a function of NP diameter, composition, and surface functionalization (6–14). With few exceptions (27–31), previous studies have mostly ignored the effect of circulatory shear flow on the composition and structure of the protein corona. This previous work has found that NPs subjected to flow, both gold NPs (13 nm, PEGylated or functionalized with tannic acid) and lipid NPs (140 nm, unmodified and PEGylated), had greater amounts of protein adsorbed on the NP surface (27,29). Interestingly, a much wider variety of proteins were identified in the coronas of the PEGylated liposomes after flow in comparison to those in static conditions. 207 distinct proteins were found in the corona formed under flow compared to 118 proteins under static conditions, with 108 proteins common to both coronas (31).

Our goal was to use a well-controlled model system of polystyrene NPs under physiologically relevant flow rates to determine how flow affected both the protein corona and the subsequent cellular binding of the protein-NP complexes. NPs, in a solution of blood serum proteins, were subjected to flow with flow rates chosen to mimic capillaries (0.085 cm/s), veins (0.85 cm/s), and arteries (8.5 cm/s) (3–5). The resulting protein corona was identified with gel electrophoresis and western blotting. We find that the total amount of protein is increased on the surface of NPs that are subjected to flow. Of specific interest is plasminogen, which is enriched on the NP surface in comparison with other serum proteins. Fluorescence and circular dichroism (CD) spectroscopy were used to probe structural changes of plasminogen in the absence of NPs, suggesting a partial denaturation under flow. In addition, protein-NP complexes formed from serum proteins subjected to flow show a slight decrease in cellular binding compared to protein-NP complexes formed under static conditions. These results suggest that flow is a parameter that should be examined in future corona studies and may guide the design of nanomedicines with improved circulation and targeting capabilities.

## MATERIALS AND METHODS

### NPs and characterization

Carboxylate-modified polystyrene NPs (“orange,” #F8809, 200 nm, Excite: 540 nm/Emit: 560 nm,  $\epsilon = 1.80 \times 10^9 \text{ M}^{-1} \text{ cm}^{-1}$ ) (Thermo Fisher Scientific, Carlsbad, CA) were used for all experiments in the main text. A comparison with similar carboxylate-modified polystyrene NPs (“yellow-green,” #F8811, 200 nm, Excite: 505 nm/Emit: 515 nm; Thermo Fisher Scientific) is discussed in the [Supporting Material](#). NP molar concentrations were calculated based on the number of NPs per milliliter ( $N$ , Eq. 1 provided by the supplier), specifically defined as follows:

$$N = \frac{(6xS) \times 10^{12}}{\pi \times P_S \times d^3}, \quad (1)$$

with  $S$  = percent solids (w/w, provided by supplier, 2% = 0.02 g/mL),  $P_S$  = density of polymer (1.05 g/mL), and  $d$  = average NP diameter (0.20  $\mu\text{m}$ ).

This number of NPs per mL ( $N$ ) is converted to a molar concentration using Avogadro’s number.

Dynamic light scattering (DynaPro NanoStar; Wyatt Technology, Santa Barbara, CA) was used to measure the diameter and polydispersity index (PDI) of the NPs in water (Table 1) (32,33). Zeta potential (ZP) (Table 1) was measured using a Malvern Zetasizer (Nano-Z; Malvern Instruments, Worcestershire, England) (33). Electrophoretic mobility was converted to a ZP using the Smoluchowski approximation. For dynamic light scattering and ZP experiments, an NP concentration of 8 pM was used. Each measurement consisted of 30 runs and was carried out in triplicate with three distinct solutions. For protein corona characterization (flow and static) and western blots, an NP concentration of 20 pM was used. Transmission electron microscopy (TEM) measurements were performed using a JEOL 100 CX II TEM at the Center for Nanostructure Characterization, part of the Materials Characterization Facility at the Institute for Materials at Georgia Tech (Atlanta, GA). Images were obtained at 100 kV with 200 kX magnification. NPs (20 pM) were drop-cast on carbon-coated copper grids and dried at room temperature. Samples were imaged using a charge-coupled device camera (Finger Lakes Instruments, Lima, NY) with Maxim software (Scientific Instruments and Applications, Duluth, GA). Averages and SDs are reported for all measurements.

### Cell culture

HeLa cervical carcinoma cells (CCL-2) (American Type Culture Collection, Manassas, VA) were cultured in minimal essential medium (MEM) (#61100) (Thermo Fisher Scientific) supplemented with 10% fetal bovine serum (FBS) (#10437-028) (Life Technologies, Carlsbad, CA) at 37°C and 5% carbon dioxide. Cells were passaged every 3–4 days.

### Protein corona formation and characterization

To obtain a protein corona under static conditions, NPs (20 pM) were combined with FBS (#10437-028) (Life Technologies) for a final FBS concentration of 10% v/v in water with 3 mL total volume. The NPs and FBS were briefly vortexed (~5 s) and then incubated for 30 min at room temperature with no additional mixing. The protein corona formed under flow was investigated at the same NP and FBS concentrations used in the static condition with flow rates controlled by peristaltic pumps with polyvinyl chloride (PVC) tubing (Fig. 1). As with the static experiments, NPs (20 pM) and FBS (10% in water, 3 mL total volume) were briefly vortexed. This mixture was pumped into the tubing of the peristaltic pump, which was then connected to the other end of the tubing with a plastic tube connector (#5463K36 or #5463K38, noted below) (McMaster-Carr, Douglasville, GA). To cover the range of flow rates, two different pumps were used. For faster flow rates (0.42, 0.85, 8.5, and 42.5 cm/s), a Harvard Apparatus peristaltic pump was used (#55-7777, “Pump 1”) (Harvard Apparatus, Holliston, MA) with PVC tubing (1/8” inner diameter (ID), 1/4” outer diameter (OD), #5155T17) (McMaster-Carr) and a plastic tube connector (#5463K38) (McMaster-Carr). Slower flow rates (0.0085, 0.042, and 0.085 cm/s) used a second peristaltic pump (#724048, “Pump 2”) (Harvard Apparatus) and PVC tubing (1/16” ID, 1/18” OD, #5155T12) (McMaster-Carr) with a plastic tube connector (#5463K36) (McMaster-Carr). The following assumptions were made regarding this flow system: 1) the protein-NP mixture is a Newtonian, incompressible fluid, and 2) the flow through the tubing is

**TABLE 1 NP Characterization**

| NPs                       | $d_h$ (nm)   | PDI              | ZP (mV)     | TEM (nm)                 |
|---------------------------|--------------|------------------|-------------|--------------------------|
| #F8809<br>(Lot: #1835801) | $275 \pm 11$ | $0.06 \pm 0.002$ | $-31 \pm 5$ | $200 \pm 10$ ,<br>n = 50 |

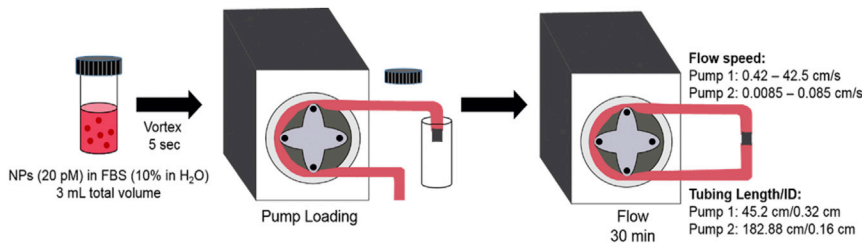

FIGURE 1 Pump system for protein corona formation under flow conditions. To see this figure in color, go online.

laminar. Based on these assumptions, we calculate volumetric flow speed, as shown in Eq. 2:

$$v = \frac{4 \times Q}{\pi \times (ID)^2}, \quad (2)$$

where  $v$  is the speed,  $Q$  is the volumetric flow set by the pump, and  $ID$  is the inner diameter of the tubing. The 3 mL NP-protein mixture, approximately the volume of the tubing, was pumped through the circle of tubing (~1 ft) for 30 min at room temperature.

Protein concentration was determined using a bicinchoninic acid (BCA) assay (#23227) (Thermo Fisher Scientific). For BCA assays, unbound and weakly bound soft-corona proteins were removed from the protein-NP mixture by centrifugation (8000 rcf, 15 min,  $\times 3$ ), and the assay was performed using the resuspended protein-NP pellet. The relative abundance of specific corona proteins was analyzed with gel electrophoresis. A detergent, sodium dodecyl sulfate (SDS) (Laemmli loading buffer, #BP-110R) (Boston BioProducts, Ashland, MA) (5 min, vortexing), was used to remove the hard corona from the NPs before loading on the gel. Protein samples (20  $\mu$ g) were heated for 5 min at 100°C and then loaded onto a gel (tris-glycine SDS gel, #456-1094) (Bio-Rad, Hercules, CA) for sodium dodecyl sulfate polyacrylamide gel electrophoresis (230 V, 35 min). A 10–190 kDa molecular weight marker (ProSieve Color Protein Marker, #50550) (Lonza, Rockland, ME) was included. Gels were stained for 1 h (SimplyBlue Safe Stain, #LC6060) (Thermo Fisher Scientific) and then imaged with an Odyssey Imager (LI-COR Biosciences, Lincoln, NE). Densitometric analysis (Image J; <http://rsb.info.nih.gov/ij/>) was used to measure any changes in protein concentration. Gel electrophoresis was carried out for both equal total protein concentration, as determined by BCA, and equal NP concentrations. To match NP concentrations, NP absorption at 541 nm was measured with an ultraviolet (UV)-visible spectrophotometer (DU 800) (Beckman Coulter, Brea, CA).

Initial identification of hard corona proteins was based on molecular weight, as determined with gel electrophoresis. Western blotting was used to confirm that the identity of the ~88 kDa protein was plasminogen. Gel electrophoresis was carried out as described above and then transferred to a polyvinylidene difluoride membrane (100 V, 45 min). The membrane was blocked (#MB-070) (Rockland Immunochemicals, Pottstown, PA) for 1 h at 4°C. The primary antibody, antiplasminogen (1:5000, ab154560) (Abcam, Cambridge, MA), was added and incubated overnight at 4°C in blocking buffer. The membrane was washed with tris-buffered saline (TBS)-Tween (three times, 10 min). Secondary antibody was incubated for 1 h at 4°C in blocking buffer (1:10,000, #926-6802) (LI-COR Biosciences). The membrane was washed twice with TBS-Tween for 10 min and then once with TBS. Blots were imaged with an Odyssey Imager (LI-COR Biosciences).

## Fluorescence spectroscopy

The fluorescence emission spectrum of human plasminogen was recorded before and after flow. Measurements were made using a 3-mm path-length quartz cell (105.254-QS) (Hellma, Müllheim, Germany). An aqueous solu-

tion of plasminogen (5  $\mu$ M, ab92924) (Abcam) was prepared, and fluorescence was measured at room temperature (Excite: 280 nm, RF-5301PC Fluorometer) (Shimadzu, Kyoto, Japan). The fluorescence of plasminogen after flow (0.85 and 8.5 cm/s, 30 min) was measured under the same conditions.

## CD spectroscopy

CD spectra (J-810) (Jasco, Oklahoma City, OK) were acquired using a 0.1- and 0.5-mm path-length quartz cell (20/O-Q-0.5) (Starna, Atascadero, CA) for plasminogen and bovine serum albumin (BSA), respectively. The bandwidth was set to 2 nm, and the integration time was a function of the photomultiplier tube voltage. Samples were measured in water at 20°C with water used as a blank. Plasminogen (0.099 mg mL<sup>-1</sup>) and BSA (0.3 mg mL<sup>-1</sup>) were measured with flow (8.5 cm/s, 30 min) and without flow. All measurements were carried out in triplicate. Spectra were smoothed with a Savitzky-Golay least-squares fit (digital filter = 10). Spectra are an average of three consecutive scans.

## Flow cytometry

Cellular binding of NPs was measured using flow cytometry (Accuri C6) (Becton Dickinson, Franklin Lakes, NJ). Cells were cultured in 25 cm<sup>2</sup> flasks to 100% confluency. Before the addition of NPs, the cells were washed three times with phosphate-buffered saline (PBS). Cells were incubated with NPs (20 pM) at 4°C for 20 min in MEM supplemented with 10% FBS after flow (8.5 cm/s). As a control experiment, cells were incubated with NPs (20 pM) at 4°C for 20 min in MEM supplemented with 10% FBS that was not subjected to flow. Cells were washed three times with PBS to remove excess NPs. Accutase (A6964) (Sigma-Aldrich, St. Louis, MO) was used to remove the cells from the surface of the culture flasks. After removal, the cell suspension was distributed into 1 mL aliquots and pelleted down (7000 rcf, 10 min, room temperature) to remove Accutase and cell culture medium. The cell pellet was resuspended in PBS and filtered with a cell strainer (SK-06336-63) (Cole-Parmer, Vernon Hills, IL) for flow cytometry. A 488 nm laser was used to excite the NP fluorescence, and fluorescence emission was collected on a 530/30 nm band-pass filter. For each experiment, 15,000 cells in the population of live cells, determined with a propidium iodide assay (2  $\mu$ g propidium iodide/mL PBS, FL-2 filter), were sampled. Histograms were analyzed using Becton Dickinson C6 software 1.0.264.21. The percent change of the mean intensity of the population was used to measure the change in NP binding. Significance was determined by a two-tailed Student's *t*-test. Error bars denote  $\pm$  SD for  $n = 3$  distinct samples.

## RESULTS AND DISCUSSION

### NP characterization

The carboxylate-modified polystyrene NPs used in these experiments were used as provided by the supplier with no

additional modification. To ensure that the NPs met specifications, they were characterized by hydrodynamic diameter ( $d_h$ ), PDI, ZP, and TEM (Fig. S1; Table 1).

### Concentration of corona proteins changes in response to flow

Polystyrene NPs (20 pM, 200 nm, carboxylate-modified) and 10% FBS were subjected to continuous flow (0.008–8.5 cm/s) through a peristaltic pump for 30 min at room temperature. After 30 min, soft corona proteins were removed from the polystyrene NPs using a series of centrifugation and resuspension steps previously optimized in the Payne Laboratory (34). A detergent (SDS) was then used to remove the tightly bound hard corona from the NPs before gel electrophoresis. The hard corona formed under flow, analyzed by BCA assay and gel electrophoresis (Fig. 2), was compared to conventional corona experiments in which the NPs and serum proteins are mixed by briefly vortexing (~5 s) and then incubated for 30 min. Of specific interest were three flow rates that were representative of capillaries (0.085 cm/s), veins (0.85 cm/s), and arteries (8.5 cm/s) (3–5).

A BCA assay showed an increase in the concentration of hard corona proteins on the NP surface for NPs subjected to flow with significant changes detected at flow rates  $\geq 0.42$  cm/s (by BCA: 142%  $\pm$  7% at 0.85 cm/s and 197%  $\pm$  5% at 8.5 cm/s; static = 100%,  $n = 4$ , NP concentrations are held constant). No changes in protein concentration were observed at 0.085 cm/s, and subsequent experiments focused on higher speeds. Multiple hard corona proteins were observed by gel electrophoresis (Fig. 2 A, loaded with equal concentrations of protein). Based on molecular weight and previous proteomics analysis of the coronas of identical NPs (33), two bands of the hard corona could be identified: plasminogen (88 kDa) and serum albumin (66 kDa). Based on previous proteomics analysis, anti-thrombin and assorted complement proteins with their cleavage products are also present in the hard corona but

are more difficult to identify based on molecular weight. Gelsolin (86 kDa) was also identified in the hard corona based on proteomics. A western blot was used to confirm the plasminogen assignment (Fig. S2 A). Densitometric analysis (ImageJ) showed that the concentration of plasminogen in the corona increased under flow (Fig. 2 B; Table 2) with relative values of 144  $\pm$  6 and 175  $\pm$  5% at 0.85 and 8.5 cm/s (both  $n = 7$ , defined as 100% for static samples, average and SD reported). In comparison, the concentration of albumin was identical under static and flow conditions (static = 100%, 101  $\pm$  2 and 104  $\pm$  3% at 0.85 and 8.5 cm/s, respectively, both  $n = 7$ ; Table 2). Unidentified protein bands at ~125 and 180 kDa showed small increases in response to flow (180 kDa = 111  $\pm$  4 and 116  $\pm$  7% at 0.85 and 8.5 cm/s, both  $n = 7$ ; 125 kDa = 111  $\pm$  3 and 122  $\pm$  6% at 0.85 and 8.5 cm/s, both  $n = 7$ ; Table 2). Similar results were obtained when gels were loaded with matched NP concentrations (Fig. S2 B) rather than matched protein concentrations (Fig. 2 A). A series of control experiments were carried out to ensure that these results were independent of the specific pump used (Fig. S3 A; Table S1) or lot of FBS (Fig. S3 B; Table S2).

For comparison, experiments were carried out with a corona formed by incubation on a platform rocker (30 min, room temperature, speed = 7 rpm) and on a vortexer (30 min). A corona formed after incubation on the platform rocker was similar to that formed under static conditions (Fig. S2 C), whereas the corona formed with constant vortexing was similar to that formed with 0.85 cm/s flow (Fig. S2 C), with an increased concentration of plasminogen detected by gel electrophoresis (155%  $\pm$  2%,  $n = 3$ ). In addition, we examined the effect of precoating the NPs with a protein corona before flow. Previous work with silica NPs (90 nm, carboxylate-modified) and gold NPs (10 nm, citrate-modified) has shown that precoating NPs alters the ultimate corona composition (28,35). Preincubation of NPs with FBS (20 pM NPs, 10% FBS, 30 min, static) followed by flow for 30 min (0.85 and

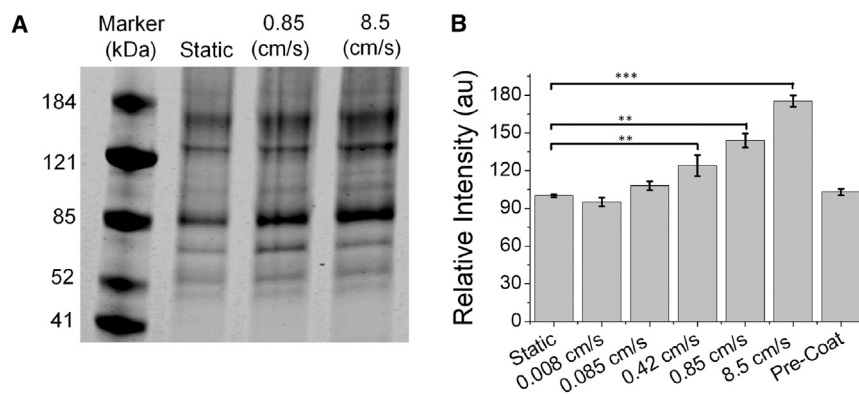

**FIGURE 2** Hard corona proteins isolated from the surface of 200 nm polystyrene NPs as a function of flow rate. (A) The relative concentrations of individual proteins were measured with gel electrophoresis. Values were normalized against conventional experiments (static). A representative gel is shown with densitometric analysis in Table 2. (B) Densitometric analysis of the band at 88 kDa (plasminogen, western blot shown in Fig. S2 A) as a function of flow rate is shown.  $n = 7$  at each speed. Fig. 2 A shows a gel loaded with equal concentrations of protein. Similar results were obtained when gels were loaded with equal NP concentrations (Fig. S2 B). Results for precoated NPs were obtained after 30 min flow at 8.5 cm/s. \*\* $p \leq 0.01$ , \*\*\* $p \leq 0.001$ , and samples with  $p$ -values not shown had nonsignificant differences.

**TABLE 2** Percent Change of Observed Corona Proteins as Function of Flow Speed

| Speed (cm/s) | Plasminogen (%) | BSA (%) | 125 kDa (%) | 180 kDa (%) |
|--------------|-----------------|---------|-------------|-------------|
| 0.85         | 144 ± 6         | 101 ± 2 | 111 ± 3     | 111 ± 4     |
| 8.5          | 175 ± 5         | 104 ± 3 | 122 ± 6     | 116 ± 7     |

8.5 cm/s) resulted in no change in plasminogen concentration (Figs. 2 B and S2 D). Although precoating NPs with serum proteins could be used in nanomedicine applications to prevent flow-dependent changes in protein corona, possibly taking advantage of the corona (36), it is worthwhile to explore the underlying reasons for flow-dependent changes in plasminogen concentration.

Previous research examined changes in the protein corona for 13 nm gold NPs modified with polyethylene glycol or tannic acid in response to flow at 0.5 cm/s for 24 h (27). Although specific corona proteins were not identified, this previous research also detected an increase in protein concentration, measured with gel electrophoresis and a colorimetric protein assay, for both NP-surface modifications. Similarly, 140 nm lipid NPs, both unmodified and PEGylated, were found to have increased protein coronas after flow at 50 cm/s for 90 min (29). For these lipid NPs, proteins in the corona were identified by mass spectrometry. Plasminogen was not found, but this likely reflects the difference in the NP composition.

### Plasminogen structure is altered in response to flow

The observation that plasminogen was enriched on NPs subjected to flow points toward possible changes in pro-

tein structure under flow. To test this possibility, we used two complementary spectroscopic methods, fluorescence and CD, to probe protein structure in response to flow. These spectroscopic experiments were carried out in the absence of NPs. Serum albumin, which showed no change in corona concentration in response to flow (Fig. 2), was used for comparison. Fluorescence spectroscopy makes use of the endogenous fluorescence of the two proteins, specifically the 19 tryptophan residues of plasminogen and two tryptophan residues of BSA. Spectra recorded before and after flow (8.5 cm/s) show changes in plasminogen structure and no changes in albumin structure (Fig. 3, A and B). The faster flow rate (8.5 cm/s), similar to that of arteries, was used to maximize possible structural changes. The increased fluorescence emission from 350 to 550 nm observed for plasminogen under flow is similar, but not identical, to the fluorescence emission of plasminogen irradiated with UV light (280 nm, 45 min, 2.3 W/m<sup>2</sup>), which shows a similar shoulder at 405 nm (37). At a slower flow rate (0.85 cm/s), similar but less pronounced spectral shifts were observed (Fig. S4 A).

CD spectroscopy, which is sensitive to protein secondary structure, shows a similar result (Fig. 3, C and D). Native plasminogen consists of  $\beta$ -strands and random coils (37,38). After flow (8.5 cm/s), plasminogen shows a decrease absorbance at both 202 and 230 nm, corresponding to a loss of ordered structure. The secondary structure of serum albumin is unchanged by flow. In comparison, treatment with 6-aminohexanoic acid, which is commonly used in studies of plasminogen, does not lead to changes in plasminogen secondary structure based on CD spectroscopy in the 190–220 nm region (38,39).

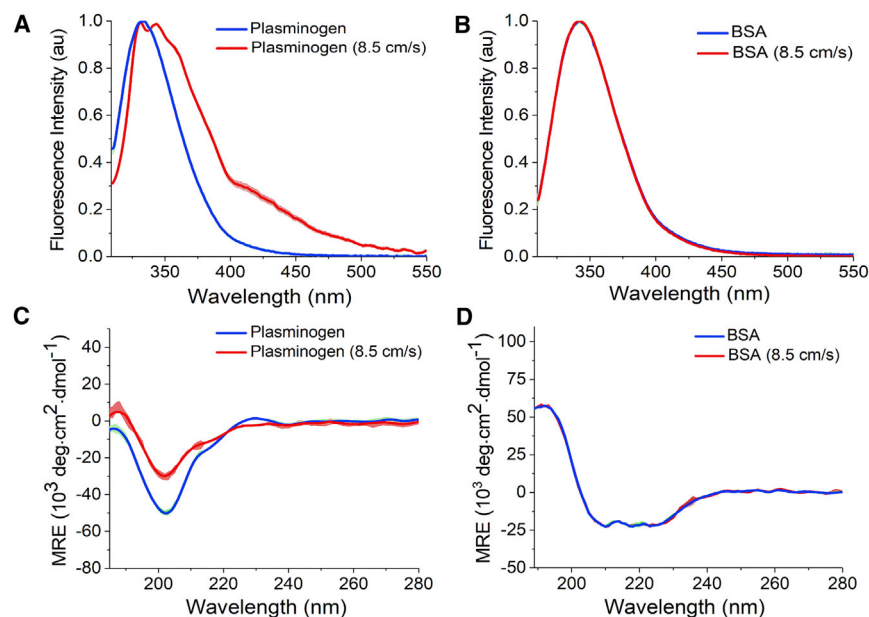

**FIGURE 3** Spectroscopic characterization of serum proteins after flow (8.5 cm/s, 30 min). (A) Fluorescence emission of plasminogen before (blue) and after (red) flow is shown. (B) Fluorescence emission of bovine serum albumin (BSA) before (blue) and after (red) flow is shown. Representative spectra (of three total) are shown. (C) CD spectra of plasminogen before (blue) and after (red) flow is shown. (D) CD spectra of BSA before (blue) and after (red) flow is shown. The SD from three distinct samples is shown by the shaded region of each line. Spectroscopic characterization of serum proteins was carried out in the absence of NPs. To see this figure in color, go online.

To determine if these flow-induced changes in protein structure in the absence of NPs were relevant to the observed changes in protein coronas (Fig. 2; Table 2), a corona was formed using FBS (10%) subjected to flow (8.5 cm/s) incubated with NPs under static conditions (30 min, room temperature, identical to conditions used for Fig. 2; Table 2). The resulting corona, characterized with gel electrophoresis, is nearly identical to that formed under flow (Fig. S5; Table S3).

The observed change in plasminogen structure in response to flow raises the question of physiological relevance. The pH of the solution before ( $7.41 \pm 0.03$ ,  $n = 3$ ) and after ( $7.45 \pm 0.02$ ,  $n = 3$ ) flow is nearly identical, suggesting a mechanically, rather than chemically, induced change in structure. As a blood serum protein, plasminogen is constantly subjected to flow, and it is interesting to consider how even small structural changes could affect the biological function, serving as the inactive precursor to plasmin. The plasminogen protein used in these experiments is obtained from human plasma, purified by lysine chromatography, and then resuspended in water for spectroscopic measurement. To determine if plasminogen returns to the native conformation after a period of flow (8.5 cm/s), we incubated the same sample at 37°C in PBS and recorded spectra from 30 min to 6 h. We found a partial but incomplete return to the initial fluorescence spectrum (Fig. S4 B). Previous work examining activation in response to UV-illumination showed that the UV-induced changes in protein structure enhanced the activation of plasminogen by  $2.6\times$  (37), suggesting that flow-induced changes in structure could be relevant for plasminogen function.

### Cellular binding

The results described above demonstrate that NPs under flow form a protein corona enriched in plasminogen (Fig. 2) and that plasminogen undergoes structural changes under flow (Fig. 3). To determine if this enrichment and change in structure had any effect on NP-cell interactions, we used flow cytometry to measure the binding of NPs to HeLa cells in the presence of 10% FBS and 10% FBS subjected to flow (8.5 cm/s). NPs (20 pM) and FBS (10%) were added to cells for 20 min of cold-binding at 4°C. At this temperature, protein-NP complexes bind to the cell surface but are not internalized by cells (34,40–45), allowing us to separate cellular binding from internalization. Equal concentrations of NPs were used, and protein concentrations were measured with UV-visible immediately before addition to cells to ensure equal concentrations. Flow cytometry was used to quantify cellular fluorescence. These measurements show a small ( $65.0 \pm 3\%$ , compared to  $85.6 \pm 1\%$ ,  $n = 3$  distinct samples) but significant decrease in cellular binding of NPs for cells incubated with serum protein subjected to flow (Fig. 4). Measurements of  $d_h$ , PDI, and ZP show nearly identical values for hard-corona-NPs with the corona formed under static conditions (30 min, room temperature)

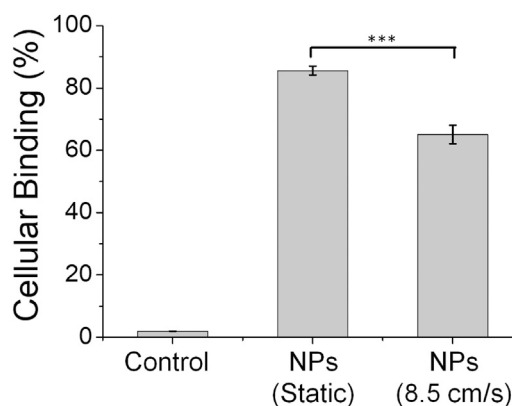

FIGURE 4 Flow cytometry was used to measure cellular binding of NPs incubated with 10% FBS under standard conditions and after 30 min of flow (8.5 cm/s). The NPs were added to the proteins after flow.  $***p \leq 0.001$ .

or continuous vortexing (30 min, room temperature), similar to flow (Fig. S2 C; Table S4). The small decrease in cellular binding observed for NPs incubated with serum proteins after flow suggests that plasminogen receptors may be responsible for some cellular binding of the protein-NP complex and that a change in the structure of plasminogen disrupts this interaction. In comparison, lipid NPs with a corona formed from circulating FBS showed increased uptake by HeLa cells (29), suggesting increased protein density or structural changes to proteins that affect cellular binding are not limited to polystyrene NPs.

Previous research from our lab showed that the cellular binding of carboxylate-modified polystyrene NPs (“yellow-green,” #F8811) (Thermo Fisher) in the presence of serum proteins was dominated by albumin and that adsorption of albumin on the NP surface led to competition with free BSA for cellular receptors on BS-C-1 and Chinese hamster ovary cells (6,34,46). A comparison of the current “orange” NPs and previous “yellow-green” NPs is provided in Fig. S6.

### CONCLUSIONS

It is becoming increasingly clear that the protein corona controls the interaction of NPs with cells (6,7,12–14). Although the main method of nanomedicine delivery is expected to be intravenous, few studies have addressed the formation of a protein corona under flow (27–31). The goal of the experiments described above was to determine if shear flow changed the composition of the protein corona and then to determine if these changes affected cellular binding. Colorimetric assays of protein concentration and gel electrophoresis show that NPs subjected to flow have a greater concentration of proteins adsorbed on the NP surface, especially for plasminogen (Fig. 2). In addition, plasminogen, in the absence of NPs, shows changes in structure in response to flow, characterized by fluorescence and CD spectroscopy (Fig. 3). The protein-NP complexes formed from FBS after flow show decreased cellular binding, measured with flow

cytometry (Fig. 4). Our studies used polystyrene NPs, but the result appears general. Gold NPs (13 nm) functionalized with polyethylene glycol or tannic acid also showed an increase in protein concentration (27). Similarly, lipid NPs (140 nm), both unmodified and PEGylated, were found to have increased protein coronas in response to flow (29). In addition to the relevance to nanomedicine, these results also highlight the technical challenges of protein corona studies. We observed differences in the protein corona that were highly dependent on the initial mixing step: rocking, vortexing, or flow (Figs. 2 and S2 C).

From a protein biophysics perspective, the structural changes of plasminogen but not BSA in response to flow are an interesting result. Changes to proteins dependent on shear force have been observed previously, measured as changes in enzyme activity or protein structure and determined by measuring changes in exposure of hydrophobic domains or molecular weight (47,48). The classic example of protein response to flow is the von Willebrand factor, which requires shear-induced proteolysis for its biological activity (49,50). Because much of the flow-dependent research is driven by bioprocessing and storage of therapeutic proteins (47), the structural changes of plasminogen in response to flow have not been examined previously. However, structural changes of plasminogen have been examined in response to 6-aminohexanoate and hydrostatic pressure (38,39,51,52). This previous work suggests that the resulting structural changes mimic the structural changes that result from plasminogen binding to surfaces, such as fibrin clots, which is the initial step in activation (51,52). In this case, it is possible that small structural changes due to flow aid in the activation of plasminogen.

## SUPPORTING MATERIAL

Six figures and five tables are available at [http://www.biophysj.org/biophysj/supplemental/S0006-3495\(18\)30296-0](http://www.biophysj.org/biophysj/supplemental/S0006-3495(18)30296-0).

## AUTHOR CONTRIBUTIONS

D.T.J. and S.M.P. performed research and analyzed data. R.G.M. and W.A.L. provided technical advice. D.T.J., S.M.P., and C.K.P. designed experiments and wrote the manuscript.

## ACKNOWLEDGMENTS

The authors thank Georgia Institute of Technology for support of this research.

## REFERENCES

1. Wicki, A., D. Witzigmann, ..., J. Huwyler. 2015. Nanomedicine in cancer therapy: challenges, opportunities, and clinical applications. *J. Control. Release.* 200:138–157.
2. Wilhelm, S., A. J. Tavares, ..., W. C. Chan. 2016. Analysis of nanoparticle delivery to tumours. *Nat. Rev. Mater.* 1:16014.
3. Baran, U., L. Shi, and R. K. Wang. 2015. Capillary blood flow imaging within human finger cuticle using optical microangiography. *J. Biophotonics.* 8:46–51.
4. Dolan, J. M., J. Kolega, and H. Meng. 2013. High wall shear stress and spatial gradients in vascular pathology: a review. *Ann. Biomed. Eng.* 41:1411–1427.
5. Gabe, I. T., J. H. Gault, ..., E. Braunwald. 1969. Measurement of instantaneous blood flow velocity and pressure in conscious man with a catheter-tip velocity probe. *Circulation.* 40:603–614.
6. Fleischer, C. C., and C. K. Payne. 2014. Nanoparticle-cell interactions: molecular structure of the protein corona and cellular outcomes. *Acc. Chem. Res.* 47:2651–2659.
7. Walczyk, D., F. B. Bombelli, ..., K. A. Dawson. 2010. What the cell “sees” in bionanoscience. *J. Am. Chem. Soc.* 132:5761–5768.
8. Lunov, O., T. Syrovets, ..., T. Simmet. 2011. Differential uptake of functionalized polystyrene nanoparticles by human macrophages and a monocytic cell line. *ACS Nano.* 5:1657–1669.
9. Gessner, A., A. Lieske, ..., R. H. Müller. 2003. Functional groups on polystyrene model nanoparticles: influence on protein adsorption. *J. Biomed. Mater. Res. A.* 65:319–326.
10. Brewer, S. H., W. R. Glomm, ..., S. Franzen. 2005. Probing BSA binding to citrate-coated gold nanoparticles and surfaces. *Langmuir.* 21:9303–9307.
11. Alkilany, A. M., P. K. Nagaria, ..., M. D. Wyatt. 2009. Cellular uptake and cytotoxicity of gold nanorods: molecular origin of cytotoxicity and surface effects. *Small.* 5:701–708.
12. Lynch, I., T. Cedervall, ..., K. A. Dawson. 2007. The nanoparticle-protein complex as a biological entity; a complex fluids and surface science challenge for the 21st century. *Adv. Colloid Interface Sci.* 134–135:167–174.
13. Treuel, L., and G. U. Nienhaus. 2012. Toward a molecular understanding of nanoparticle-protein interactions. *Biophys. Rev.* 4:137–147.
14. Park, S., and K. Hamad-Schifferli. 2010. Nanoscale interfaces to biology. *Curr. Opin. Chem. Biol.* 14:616–622.
15. Carrillo-Carrion, C., M. Carril, and W. J. Parak. 2017. Techniques for the experimental investigation of the protein corona. *Curr. Opin. Biotechnol.* 46:106–113.
16. Gref, R., A. Domb, ..., R. Langer. 1995. The controlled intravenous delivery of drugs using PEG-coated sterically stabilized nanospheres. *Adv. Drug Deliv. Rev.* 16:215–233.
17. Gref, R., M. Lück, ..., R. H. Müller. 2000. ‘Stealth’ corona-core nanoparticles surface modified by polyethylene glycol (PEG): influences of the corona (PEG chain length and surface density) and of the core composition on phagocytic uptake and plasma protein adsorption. *Colloids Surf. B Biointerfaces.* 18:301–313.
18. Walkey, C. D., J. B. Olsen, ..., W. C. W. Chan. 2012. Nanoparticle size and surface chemistry determine serum protein adsorption and macrophage uptake. *J. Am. Chem. Soc.* 134:2139–2147.
19. Boulos, S. P., T. A. Davis, ..., C. J. Murphy. 2013. Nanoparticle-protein interactions: a thermodynamic and kinetic study of the adsorption of bovine serum albumin to gold nanoparticle surfaces. *Langmuir.* 29:14984–14996.
20. Runa, S., A. Hill, ..., C. K. Payne. 2014. PEGylated nanoparticles: protein corona and secondary structure. In Proceedings SPIE, Physical Chemistry of Interfaces and Nanomaterials XIII 9165, SPIE, p. 91651F.
21. Papi, M., D. Caputo, ..., G. Caracciolo. 2017. Clinically approved PEGylated nanoparticles are covered by a protein corona that boosts the uptake by cancer cells. *Nanoscale.* 9:10327–10334.
22. Li, Y., Y. Xu, ..., H. Mao. 2018. Impact of anti-biofouling surface coatings on the properties of nanomaterials and their biomedical applications. *J. Mater. Chem. B.* 6:9–24.
23. Cedervall, T., I. Lynch, ..., S. Linse. 2007. Understanding the nanoparticle-protein corona using methods to quantify exchange rates and

- affinities of proteins for nanoparticles. *Proc. Natl. Acad. Sci. USA*. 104:2050–2055.
24. Milani, S., F. B. Bombelli, ..., J. Rädler. 2012. Reversible versus irreversible binding of transferrin to polystyrene nanoparticles: soft and hard corona. *ACS Nano*. 6:2532–2541.
  25. Monopoli, M. P., C. Åberg, ..., K. A. Dawson. 2012. Biomolecular coronas provide the biological identity of nanosized materials. *Nat. Nanotechnol.* 7:779–786.
  26. Liu, W., J. Rose, ..., C. Vidaud. 2013. Protein corona formation for nanomaterials and proteins of a similar size: hard or soft corona? *Nanoscale*. 5:1658–1668.
  27. Braun, N. J., M. C. DeBrosse, ..., K. K. Comfort. 2016. Modification of the protein corona-nanoparticle complex by physiological factors. *Mater. Sci. Eng. C*. 64:34–42.
  28. Luby, A. O., E. K. Breitner, and K. K. Comfort. 2016. Preliminary protein corona formation stabilizes gold nanoparticles and improves deposition efficiency. *Appl. Nanosci.* 6:827–836.
  29. Palchetti, S., D. Pozzi, ..., A. Laganà. 2017. Influence of dynamic flow environment on nanoparticle-protein corona: from protein patterns to uptake in cancer cells. *Colloids Surf. B Biointerfaces*. 153:263–271.
  30. Pozzi, D., G. Caracciolo, ..., A. Laganà. 2015. The biomolecular corona of nanoparticles in circulating biological media. *Nanoscale*. 7:13958–13966.
  31. Palchetti, S., V. Colapicchioni, ..., A. Laganà. 2016. The protein corona of circulating PEGylated liposomes. *Biochim. Biophys. Acta*. 1858:189–196.
  32. Jayaram, D. T., S. Runa, ..., C. K. Payne. 2017. Nanoparticle-induced oxidation of corona proteins initiates an oxidative stress response in cells. *Nanoscale*. 9:7595–7601.
  33. Runa, S., D. Khanal, ..., C. K. Payne. 2016. TiO<sub>2</sub> nanoparticles alter the expression of peroxiredoxin antioxidant genes. *J. Phys. Chem. C*. 120:20736–20742.
  34. Fleischer, C. C., and C. K. Payne. 2012. Nanoparticle surface charge mediates the cellular receptors used by protein-nanoparticle complexes. *J. Phys. Chem. B*. 116:8901–8907.
  35. Mirshafiee, V., R. Kim, ..., M. L. Kraft. 2016. Impact of protein pre-coating on the protein corona composition and nanoparticle cellular uptake. *Biomaterials*. 75:295–304.
  36. Hamad-Schifferli, K. 2015. Exploiting the novel properties of protein coronas: emerging applications in nanomedicine. *Nanomedicine (Lond.)*. 10:1663–1674.
  37. Correia, M., T. Snabe, ..., M. T. Neves-Petersen. 2015. Photonic activation of plasminogen induced by low dose UVB. *PLoS One*. 10:e0116737.
  38. Sjöholm, I. 1973. Studies on the conformational changes of plasminogen induced during activation to plasmin and by 6-aminohexanoic acid. *Eur. J. Biochem.* 39:471–479.
  39. Kornblatt, J. A., I. Rajotte, and F. Heitz. 2001. Reaction of canine plasminogen with 6-aminohexanoate: a thermodynamic study combining fluorescence, circular dichroism, and isothermal titration calorimetry. *Biochemistry*. 40:3639–3647.
  40. Payne, C. K., S. A. Jones, ..., X. Zhuang. 2007. Internalization and trafficking of cell surface proteoglycans and proteoglycan-binding ligands. *Traffic*. 8:389–401.
  41. Doorley, G. W., and C. K. Payne. 2011. Cellular binding of nanoparticles in the presence of serum proteins. *Chem. Commun. (Camb.)*. 47:466–468.
  42. Doorley, G. W., and C. K. Payne. 2012. Nanoparticles act as protein carriers during cellular internalization. *Chem. Commun. (Camb.)*. 48:2961–2963.
  43. Hill, A., and C. K. Payne. 2014. Impact of serum proteins on MRI contrast agents: cellular binding and T<sub>2</sub> relaxation. *RSC Advances*. 4:31735–31744.
  44. Lesniak, A., A. Salvati, ..., C. Åberg. 2013. Nanoparticle adhesion to the cell membrane and its effect on nanoparticle uptake efficiency. *J. Am. Chem. Soc.* 135:1438–1444.
  45. Szymanski, C. J., H. Yi, ..., C. K. Payne. 2013. Imaging intracellular quantum dots: fluorescence microscopy and transmission electron microscopy. In *Nanobiotechnology Protocols*. S. J. Rosenthal and D. X. Wright, eds. Humana Press, pp. 21–23.
  46. Fleischer, C. C., and C. K. Payne. 2014. Secondary structure of corona proteins determines the cell surface receptors used by nanoparticles. *J. Phys. Chem. B*. 118:14017–14026.
  47. Bekard, I. B., P. Asimakis, ..., D. E. Dunstan. 2011. The effects of shear flow on protein structure and function. *Biopolymers*. 95:733–745.
  48. Thomas, C. R., and D. Geer. 2011. Effects of shear on proteins in solution. *Biotechnol. Lett.* 33:443–456.
  49. Sadler, J. E. 1998. Biochemistry and genetics of von Willebrand factor. *Annu. Rev. Biochem.* 67:395–424.
  50. Shim, K., P. J. Anderson, ..., J. E. Sadler. 2008. Platelet-VWF complexes are preferred substrates of ADAMTS13 under fluid shear stress. *Blood*. 111:651–657.
  51. Ponting, C. P., J. M. Marshall, and S. A. Cederholm-Williams. 1992. Plasminogen: a structural review. *Blood Coagul. Fibrinolysis*. 3:605–614.
  52. Kornblatt, J. A., M. J. Kornblatt, ..., C. Balny. 1999. The effects of hydrostatic pressure on the conformation of plasminogen. *Eur. J. Biochem.* 265:120–126.



**Biophysical Journal, Volume 114**

**Supplemental Information**

**Protein Corona in Response to Flow: Effect on Protein Concentration  
and Structure**

**Dhanya T. Jayaram, Samantha M. Pustulka, Robert G. Mannino, Wilbur A.  
Lam, and Christine K. Payne**

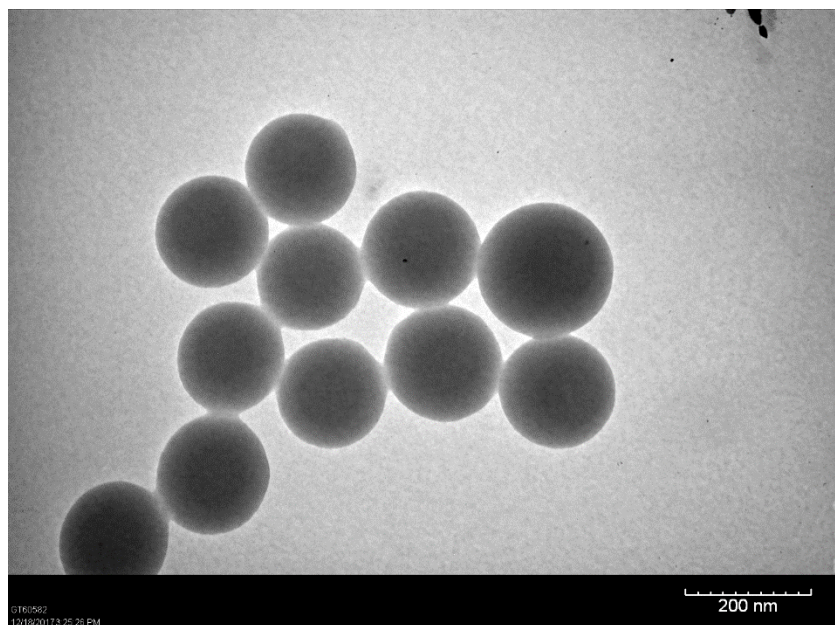

**Figure S1.** TEM (JEOL 100 CX II, 100 kV with 200 kX magnification) of the polystyrene NPs (“orange,” #F8809, 200 nm, Excite: 540 nm/Emit: 560 nm ThermoFisher Scientific, Carlsbad, CA) used in the main text. Diameter =  $200 \text{ nm} \pm 15 \text{ nm}$  for  $n=50$  NPs, analyzed with ImageJ.

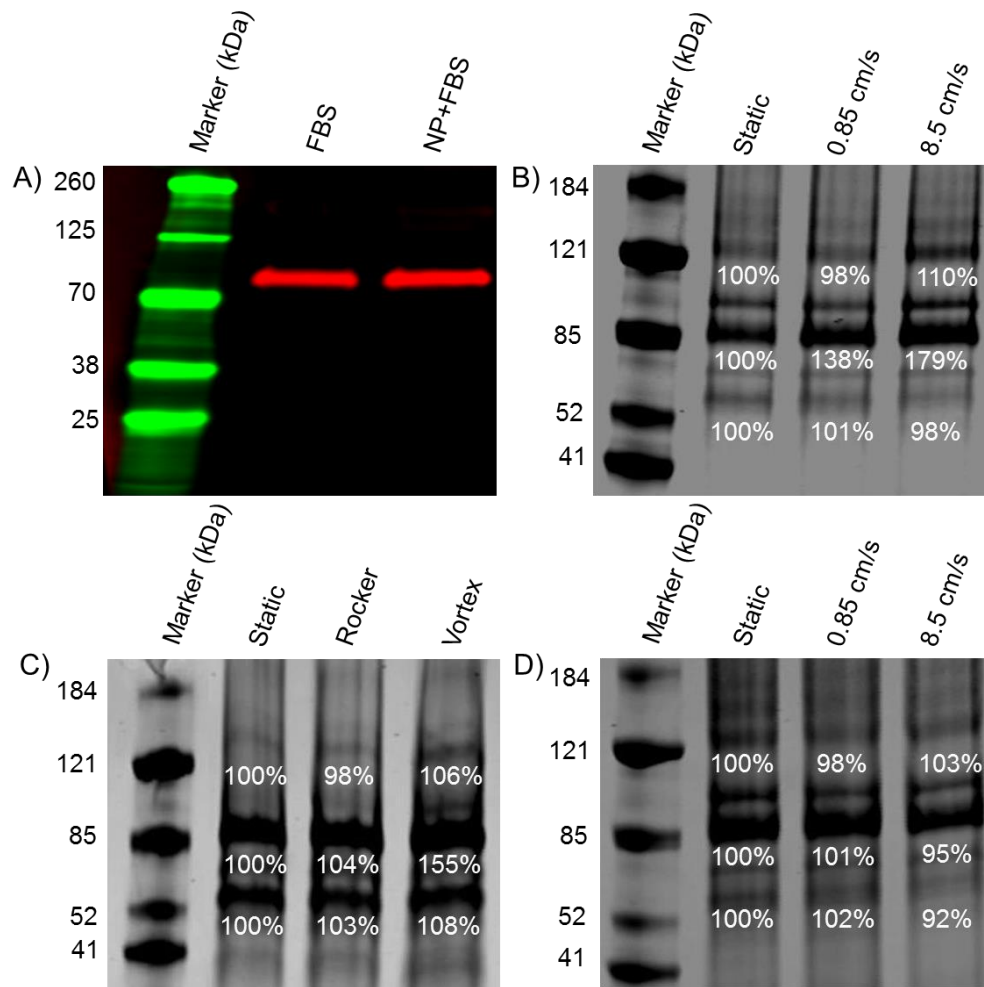

**Figure S2.** Additional characterization of the protein corona. Representative gels are shown with the values measured for that specific gel. Averages and standard deviations for triplicate experiments are reported in the caption. (A) Western blotting was used to confirm the presence of plasminogen in FBS and the protein corona (NP+FBS). (B) Loading equal concentrations of NPs onto the gel showed a similar enrichment in plasminogen at 88 kDa. (0.85 cm/s = 135%  $\pm$  4%, 8.5 cm/s = 178%  $\pm$  6%; both n=3) with BSA constant (0.85 cm/s = 103%  $\pm$  2%, 8.5 cm/s = 102%  $\pm$  4%; both n=3). Static values are set to 100%. (C) The mixing method used affected the final protein corona. Use of a rocker (30 min) was similar to static conditions (104%  $\pm$  3%, n=3). Use of a vortexer (30 min) was similar to the use of higher flow speeds (155%  $\pm$  4%, n=3). (D) Pre-coating the NPs with a protein corona (30 min, Static) prevented any flow (30 min, 8.5 cm/s)-dependent changes (100%  $\pm$  4%, n=3).

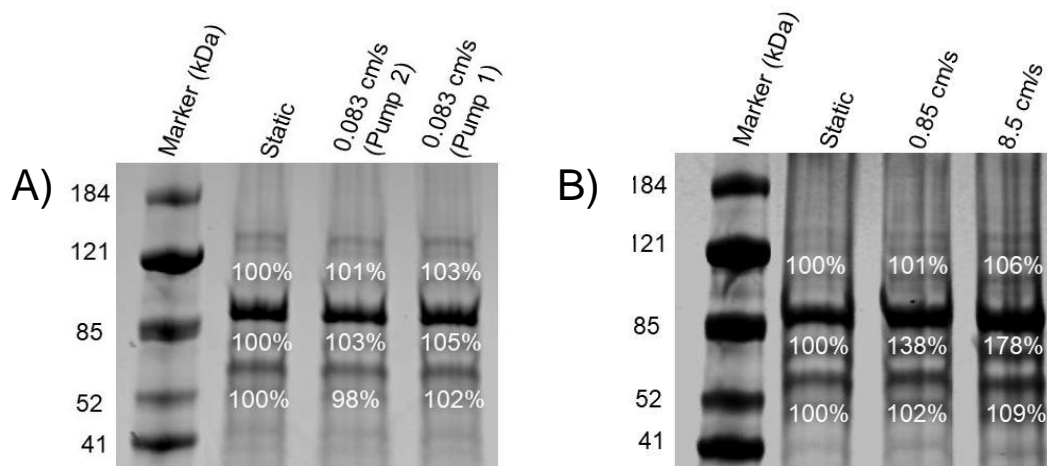

**Figure S3.** Control experiments to ensure results are independent of specific pump used or batch (lot) of FBS. Representative gels are shown with the values measured for that specific gel. Averages and standard deviations for triplicate experiments are reported in Tables S1 and S2. (A) Two pumps were used for these experiments. For faster flow rates (0.42, 0.85, 8.5 and 42.5 cm/s), a Harvard Apparatus peristaltic pump was used (#55-7777, “Pump 1,” Harvard Apparatus, Holliston, MA). Slower flow rates (0.0085, 0.042 and 0.085 cm/s) used a second peristaltic pump (#724048, “Pump 2,” Harvard Apparatus, Holliston, MA). As no changes in protein concentration were observed at slower speeds, which were all obtained using Pump 2, we wanted to ensure that Pump 1, rather than the faster speeds, was *not* responsible for the observed changes. Coronas were obtained using Pump 1 and Pump 2 at the same speed (0.083 cm/s) using methods identical to Figure 2. Identical coronas were obtained (representative gel and Table S1) demonstrating that the pump is not responsible for the altered corona. (B) To ensure that the results described in the main text were not specific to that batch of FBS (lot unknown), experiments were repeated with a new batch (Lot # 1927414) of FBS. Although it is possible that this lot is the same as our previous, untracked lot, we find this unlikely as the bottles of FBS were bought ~1 year apart. The same trends were observed with the new lot of FBS (compare to Table 1).

**Table S1. Percent change in protein concentration as a function of pump.**

| <b>Speed</b>                   | <b>Plasminogen (%)</b> | <b>BSA (%)</b> | <b>125 kDa (%)</b> |
|--------------------------------|------------------------|----------------|--------------------|
| <b>Pump 1<br/>(0.083 cm/s)</b> | 108 ± 6                | 103 ± 4        | 104 ± 2            |
| <b>Pump 2<br/>(0.083 cm/s)</b> | 104 ± 5                | 102 ± 5        | 101 ± 5            |

**Table S2. Percent change in protein concentration using FBS (Lot #1927414).**

| <b>Speed</b>     | <b>Plasminogen (%)</b> | <b>BSA (%)</b> | <b>125 kDa (%)</b> |
|------------------|------------------------|----------------|--------------------|
| <b>0.85 cm/s</b> | 136 ± 3                | 103 ± 2        | 105 ± 5            |
| <b>8.5 cm/s</b>  | 181 ± 5                | 106 ± 3        | 108 ± 6            |

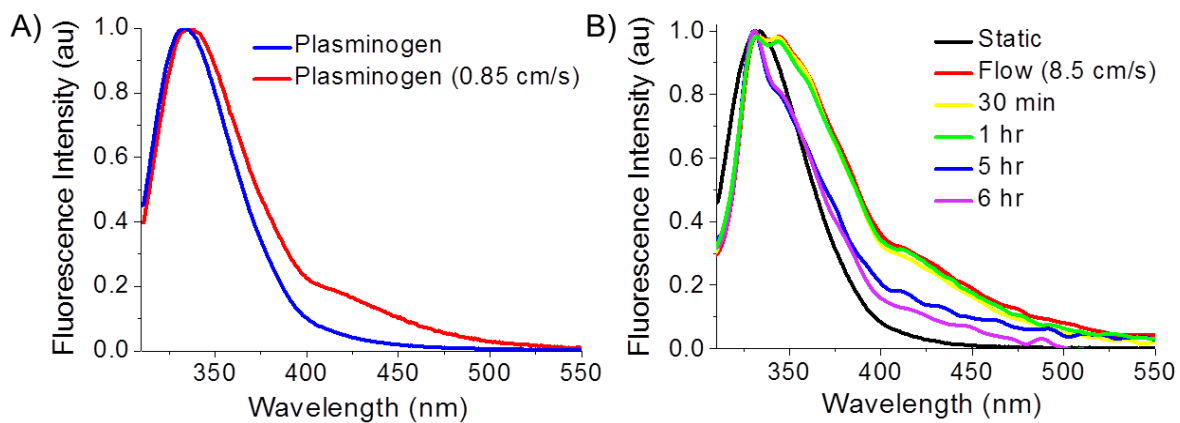

**Figure S4.** Fluorescence spectra of plasminogen. (A) Slower flow rates (0.85 cm/s) led to changes in fluorescence emission, similar to 8.5 cm/s (Fig. 3). (B) Following flow (8.5 cm/s), the fluorescence spectrum of plasminogen showed incomplete recovery over a 6 hr period (37 °C, PBS).

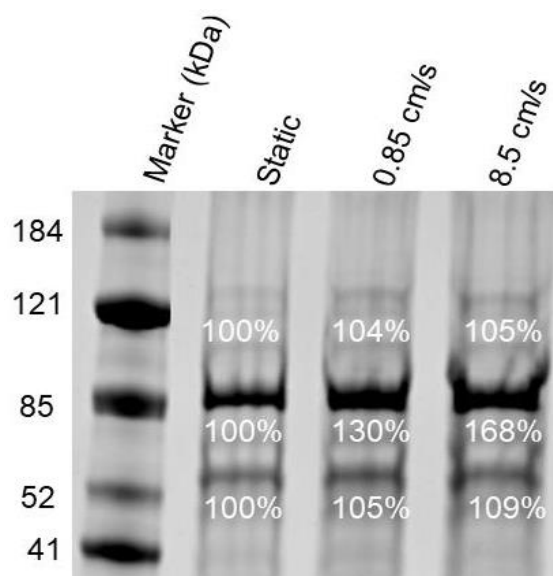

**Figure S5.** Flowing FBS in the absence of NPs (30 min) then using this FBS solution to form a protein corona under static conditions results in the same enrichment in plasminogen as a corona formed under flow. A representative gel is shown with the values measured for that specific gel. Averages and standard deviations for triplicate experiments are reported in Table S3.

**Table S3.** Percent change of proteins for a corona formed using FBS subjected to flow with the corona formed under static conditions.

| Speed            | Plasminogen (%) | BSA (%) | 125 kDa (%) |
|------------------|-----------------|---------|-------------|
| <b>0.85 cm/s</b> | 133 ± 6         | 103 ± 3 | 103 ± 5     |
| <b>8.5 cm/s</b>  | 172 ± 7         | 107 ± 5 | 105 ± 8     |

**Table S4. Characterization of hard corona-NPs with the corona formed under either static conditions (30 min, room temperature) or with constant vortexing (30 min, room temperature).** Vortexing for 30 min results in a corona identical to that of the higher flow speeds (Fig. S2C). Hard corona-NPs (20 pM) were resuspended in water for DLS measurements, n=3.

| hard corona-NPs | $d_h$ (nm)  | PDI             | ZP (mV)     |
|-----------------|-------------|-----------------|-------------|
| <b>Static</b>   | $312 \pm 4$ | $0.12 \pm 0.02$ | $-17 \pm 3$ |
| <b>Vortex</b>   | $313 \pm 4$ | $0.14 \pm 0.02$ | $-18 \pm 3$ |



**Table S5. Characterization of “yellow-green” NPs.**

| NPs                             | $d_h$ (nm)  | PDI             | ZP (mV)     | TEM (nm)               |
|---------------------------------|-------------|-----------------|-------------|------------------------|
| <b>#F8811</b><br>(Lot: #28609W) | $252 \pm 4$ | $0.14 \pm 0.01$ | $-51 \pm 1$ | $190 \pm 10$ ,<br>n=50 |

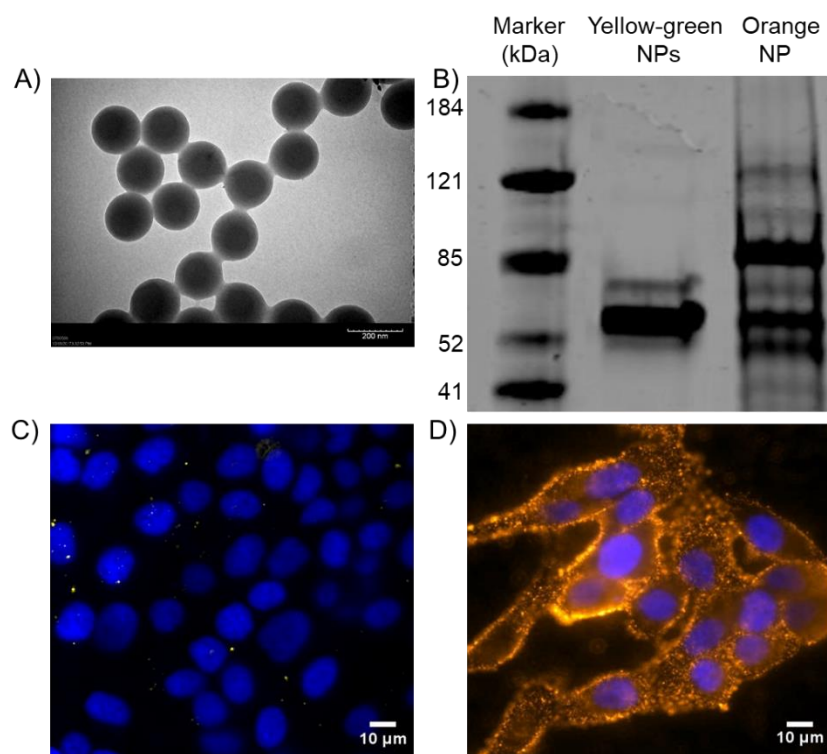

**Figure S6.** A comparison of carboxylate-modified polystyrene NPs (“orange,” #F8809, 200 nm, Excite: 540 nm/Emit: 560 nm, ThermoFisher Scientific, Carlsbad, CA) used in the main text and carboxylate-modified polystyrene NPs (“yellow-green,” #F8811, 200 nm, Excite: 505 nm/Emit: 515 nm, ThermoFisher Scientific, Carlsbad, CA) used in previous Payne Lab experiments (Ref. 6, 34, 46), show that small differences in NPs can lead to large differences in protein corona and, subsequently, cellular binding. (A) TEM (JEOL 100 CX II, 100 kV with 200 kX magnification) image of the “yellow-green” polystyrene NPs. (B) Gel electrophoresis shows that “yellow-green” carboxylate-modified polystyrene NPs form a protein corona dominated by albumin (66 kDa). The dominant corona protein on the “orange” NPs used in the current studies is plasminogen (88 kDa). (C) Imaging (IX-71 microscope, 60x water-immersion objective, 1.20 N.A., Olympus, with EMCCD camera, DU-897, Andor) the binding of NPs (20 pM) to HeLa cells confirms that cellular binding of the “yellow-green” NPs is blocked by free serum proteins, as observed previously with BS-C-1 and CHO cells (Ref. 6, 34, 46). NPs and FBS (10%) were added to cells for 20 minutes of cold-binding at 4 °C. Prior to imaging, cells were washed 3 times with PBS to remove excess NPs. Nuclei are stained with DAPI (blue, 27 μM). (D) Binding of the “orange” NPs is not blocked by serum proteins. Both imaging experiments were performed under static conditions in the absence of flow with cells at identical passage number. Future work will examine the NP differences responsible for these differences in protein corona.
